# Supplementary material
Source: HighWire-hosted journal article supplement (https://jnm.snmjournals.org/highwire/filestream/95289/field_highwire_adjunct_files/0/189654_Supplemental_Data.pdf)
Supplement: 189654_Supplemental_Data.pdf [file 189654_Supplemental_Data.pdf]

Supplemental Table 1. Previous medication history list compiled for all MDD subjects

| <b><u>Previous Medication List</u></b> |
|----------------------------------------|
| TOPAMAX                                |
| CELEXA                                 |
| PROZAC                                 |
| KLONOPIN                               |
| CYLERT                                 |
| TRAZADONE                              |
| ZOLOFT                                 |
| CYMBALTA                               |
| ELAVIL                                 |
| SONATA                                 |
| REMERON                                |
| RITALIN                                |
| CYMBALTA                               |
| WELLBUTRIN                             |
| LEXAPRO                                |
| EFFEXOR                                |
| ATIVAN                                 |
| LORAZEPAM                              |
| EFFEXOR                                |
| PAXIL                                  |
| <b><u>CLINICAL TRIAL UNKNOWN</u></b>   |
